# Supplementary material
Source: publisher site journal article supplement (https://static.cambridge.org/content/id/urn:cambridge.org:id:article:S104161020500308X/resource/name/Hendrie_supp_tables.doc)
Supplement: Supplementary file 1 [file Hendrie_supp_tables.doc]

Table S5. Factor Analysis Results for Each Site; Factor Loadings of the CHIF items as One Factor and Eigenvalues

|  | Indianapolis | Ibadan |
| --- | --- | --- |
| **Factor Loadings** | | |
| Personal history | 0.85 | 0.53 |
| Cook food | 0.82 | 0.61 |
| Shopping | 0.90 | 0.79 |
| Finances | 0.83 | 0.71 |
| Medicine | 0.88 | 0.69 |
| Church | 0.81 | 0.55 |
| Communicate via telephone | 0.81 | 0.61 |
| Roles | 0.86 | 0.77 |
| Organization | 0.72 | 0.47 |
| Recognition | 0.81 | 0.55 |
|  | | |
| **Eigenvalues** | | |
| 1 | 6.89 | 4.05 |
| 2 | 0.56 | 1.16 |
| 3 | 0.51 | 0.91 |
| 4 | 0.41 | 0.79 |
| 5 | 0.39 | 0.65 |
| 6 | 0.35 | 0.63 |
| 7 | 0.29 | 0.56 |
| 8 | 0.24 | 0.47 |
| 9 | 0.20 | 0.42 |
| 10 | 0.16 | 0.37 |

Figure 1. ROC Curves for CHIF at Both Sites of Dementia vs. Non-Demented

Figure S2. Scree Plots of CHIF at Both Sites
